# Supplementary material for: Absence of correlation between radiation-induced CD8 T-lymphocyte apoptosis and sequelae in patients with prostate cancer accidentally overexposed to radiation
Source: PubMed Central journal article supplement (PMC6135683; doi:10.18632/oncotarget.26001), 2018-08-24
Supplement: oncotarget-09-32680-s001.pdf [file oncotarget-09-32680-s001.pdf]

# Absence of correlation between radiation-induced CD8 T-lymphocyte apoptosis and sequelae in patients with prostate cancer accidentally overexposed to radiation

## SUPPLEMENTARY MATERIALS

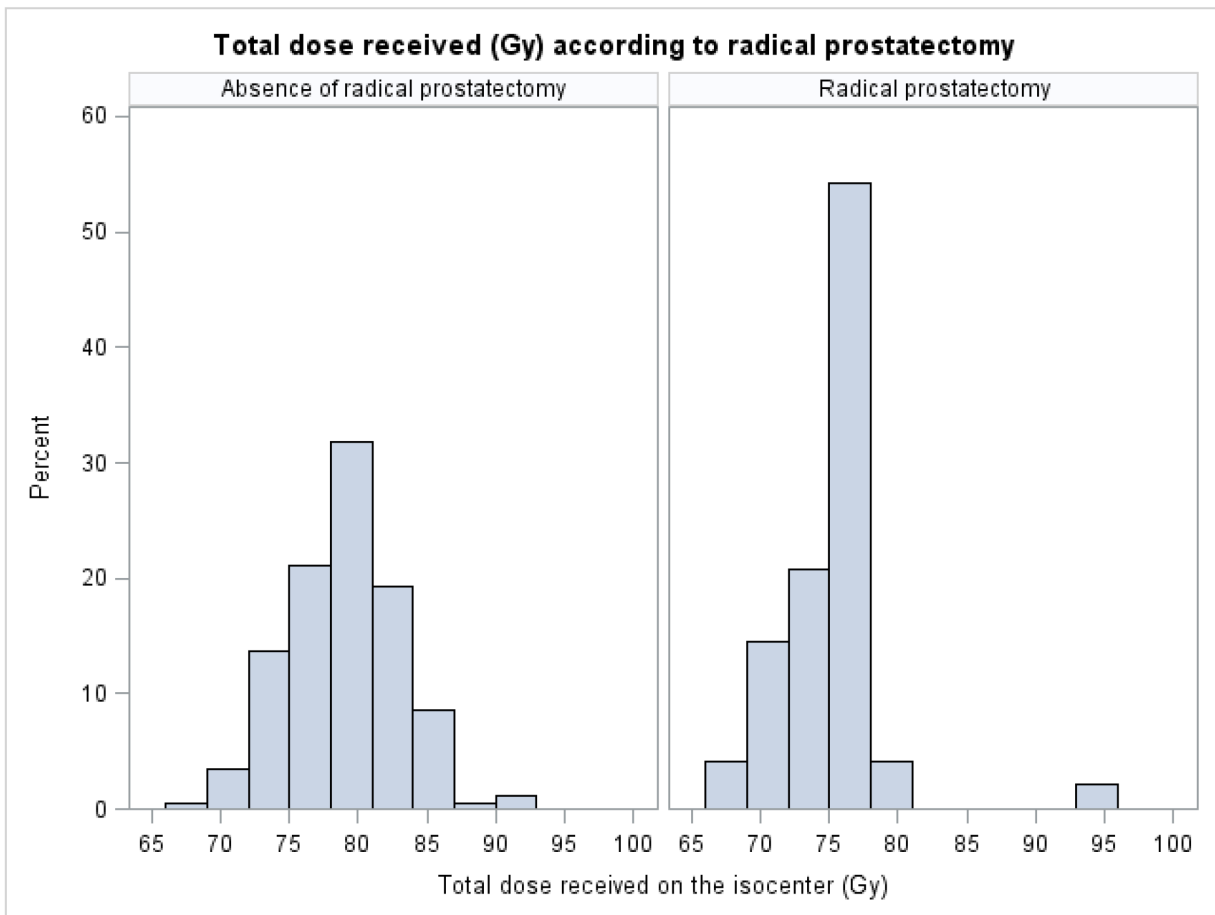

Supplementary Figure 1: Distribution of total dose in EPOPA cohort according to preliminary radical prostatectomy.

**Supplementary Table 1: Maximal digestive (A, B) and urinary (C, D) toxicity and CD4 (A, C) and CD8 (B, D) RILA in EPOPA cohort in tercile distribution**

| <b>Maximal digestive toxicity</b> |               |             |               |                  |
|-----------------------------------|---------------|-------------|---------------|------------------|
| <b>A</b>                          | <b>Gr 0-1</b> | <b>Gr 2</b> | <b>Gr 3-4</b> | <b>Total (%)</b> |
| <b>CD4 RILA &lt;10.0</b>          | 31 (13.8)     | 30 (13.4)   | 13 (5.8)      | 74 (33.0)        |
| <b>10.0≤CD4 RILA &lt;13.5</b>     | 36 (16.1)     | 28 (12.5)   | 11 (4.9)      | 75 (33.5)        |
| <b>CD4 RILA ≥13.5</b>             | 32 (14.3)     | 30 (13.4)   | 13 (5.8)      | 75 (33.5)        |
| <b>Total (%)</b>                  | 99 (44.2)     | 88 (39.3)   | 37 (16.5)     | 224 (100.0)      |
| <b>B</b>                          | <b>Gr 0-1</b> | <b>Gr 2</b> | <b>Gr 3-4</b> | <b>Total (%)</b> |
| <b>CD8 RILA &lt;13.1</b>          | 33 (14.7)     | 30 (13.4)   | 11 (4.9)      | 74 (33.0)        |
| <b>13.1≤CD8 RILA &lt;17.3</b>     | 33 (14.7)     | 30 (13.4)   | 12 (5.4)      | 75 (33.5)        |
| <b>CD8 RILA ≥17.3</b>             | 33 (14.7)     | 28 (12.5)   | 14 (6.3)      | 75 (33.5)        |
| <b>Total (%)</b>                  | 99 (44.2)     | 88 (39.3)   | 37 (16.5)     | 224 (100.0)      |
| <b>Maximal urinary toxicity</b>   |               |             |               |                  |
| <b>C</b>                          | <b>Gr 0-1</b> | <b>Gr 2</b> | <b>Gr 3-4</b> | <b>Total (%)</b> |
| <b>CD4 RILA &lt;10.0</b>          | 23(10.3)      | 26 (11.6)   | 25 (11.2)     | 74 (33.0)        |
| <b>10.0≤CD4 RILA &lt;13.5</b>     | 19 (8.5)      | 22(9.8)     | 34 (15.18)    | 75 (33.5)        |
| <b>CD4 RILA ≥13.5</b>             | 20 (8.9)      | 33 (14.7)   | 22 (9.8)      | 75(33.5)         |
| <b>Total (%)</b>                  | 62 (27.7)     | 81 (36.1)   | 81 (36.2)     | 224 (100.0)      |
| <b>D</b>                          | <b>Gr 0-1</b> | <b>Gr 2</b> | <b>Gr 3-4</b> | <b>Total (%)</b> |
| <b>CD8 RILA &lt;13.1</b>          | 21(9.4)       | 25 (11.2)   | 28 (12.5)     | 74 (33.0)        |
| <b>13.1≤CD8 RILA &lt;17.3</b>     | 19(8.5)       | 29(12.95)   | 27 (12.05)    | 75 (33.5)        |
| <b>CD8 RILA ≥17.3</b>             | 22(9.8)       | 27(12.1)    | 26 (11.6)     | 75 (33.5)        |
| <b>Total (%)</b>                  | 62(27.68)     | 81(36.16)   | 81(36.16)     | 224 (100.0)      |

**Supplementary Table 2: CD4 and CD8 RILA in patients exhibiting grade 0-1 digestive or urinary toxicity and having been exposed to more than 80 Gy in EPOPA**

|                  |                  | <b>N</b> | <b>CD4 RILA mean±SD</b> | <b>CD8 RILA mean±SD</b> |
|------------------|------------------|----------|-------------------------|-------------------------|
| <b>Digestive</b> | G0-1 and ≥ 80 Gy | 187      | 12.3±4.7                | 15.9±5.9                |
|                  | Others           | 37       | 12.5±4.1                | 15.9±5.4                |
| <b>Urinary</b>   | G0-1 and ≥ 80 Gy | 198      | 12.4±4.7                | 16.0±5.9                |
|                  | Others           | 26       | 12.2±3.7                | 15.1±5.1                |

**Supplementary Table 3: Cumulative incidence of grade  $\geq 2$  digestive or urinary toxicity in EPOPA according to CD4 and CD8 RILA distribution**

| <b>Digestive toxicity</b>                     | <b>2.5 years- cumulative incidence of grade <math>\geq 2</math> [IC95%]</b> | <b>5 years-cumulative incidence of grade <math>\geq 2</math> [IC95%]</b> |
|-----------------------------------------------|-----------------------------------------------------------------------------|--------------------------------------------------------------------------|
| <b>CD4 RILA &lt;10.0</b>                      | 47.3 [35.9-58.7]                                                            | 52.8 [41.4-64.3]                                                         |
| <b>10.0<math>\leq</math>CD4 RILA &lt;13.5</b> | 40.0 [28.9-51.1]                                                            | 50.7 [39.4-62.0]                                                         |
| <b>CD4 RILA <math>\geq 13.5</math></b>        | 49.3 [38.0-60.6]                                                            | 55.0 [43.6-66.3]                                                         |
| <b>CD8 RILA &lt;13.1</b>                      | 40.5 [29.3-51.7]                                                            | 51.6 [40.2-63.1]                                                         |
| <b>13.1<math>\leq</math>CD8 RILA &lt;17.3</b> | 48.0 [36.7-59.3]                                                            | 52.0 [40.7-63.3]                                                         |
| <b>CD8 RILA &gt;17.3</b>                      | 48.0 [36.7-59.3]                                                            | 55.1 [43.8-66.5]                                                         |

  

| <b>Urinary toxicity</b>                       | <b>2.5 years- cumulative incidence of grade <math>\geq 2</math> [IC95%]</b> | <b>5 years-cumulative incidence of grade <math>\geq 2</math> [IC95%]</b> |
|-----------------------------------------------|-----------------------------------------------------------------------------|--------------------------------------------------------------------------|
| <b>CD4 RILA <math>\leq 10.0</math></b>        | 36.5 [25.5-47.4]                                                            | 42.1 [30.8-53.4]                                                         |
| <b>10.0<math>\leq</math>CD4 RILA &lt;13.5</b> | 48.0 [36.7-59.3]                                                            | 56.0 [44.8-67.2]                                                         |
| <b>CD4 RILA <math>\geq 13.5</math></b>        | 54.7 [43.4-65.9]                                                            | 62.0 [50.8-73.1]                                                         |
| <b>CD8 RILA <math>\leq 13.1</math></b>        | 44.6 [33.3-55.9]                                                            | 50.1 [41.6-64.5]                                                         |
| <b>13.1<math>\leq</math>CD8 RILA &lt;17.3</b> | 42.7 [31.5-53.9]                                                            | 48.0 [36.7-59.3]                                                         |
| <b>CD8 RILA <math>\geq 17.3</math></b>        | 52.0 [40.7-63.3]                                                            | 59.3 [48.0-70.5]                                                         |
